***Title:*** Learning to synchronize: Midfrontal theta dynamics during rule switching

***Abbreviated title:*** Midfrontal theta during rule switching

*Authors:* Pieter Verbeke<sup>1</sup>, Kate Ergo<sup>1</sup>, Esther De Loof<sup>1</sup>, Tom Verguts<sup>1</sup>

*Affiliations:* <sup>1</sup>Department of Experimental Psychology; Ghent University; B9000

Corresponding author email: [pjverbek.verbeke@ugent.be](mailto:pjverbek.verbeke@ugent.be)

*Number of pages:* 32

*Number of figures:* 8

*Number of tables:* 1

*Number of words:*

*Abstract:* 221

*Introduction:* 638

*Discussion:*1499

*Conflict of interests:* The authors declare no competing financial interests.

*Acknowledgements:* PV and KE were supported by grant 1102519N and grant 1153418N from Research Foundation Flanders, respectively. EDL and TV were supported by grant BOF17/GOA/004 from the Ghent University Research Council. We thank Clay Holroyd for useful comments on this paper.

## Abstract

In recent years, several hierarchical extensions of well-known learning algorithms have been proposed. For example, when stimulus-action mappings vary across time or context, the brain may learn two or more stimulus-action mappings in separate modules, and additionally (at a hierarchically higher level) learn to appropriately switch between those modules. However, how the brain mechanistically coordinates neural communication to implement such hierarchical learning, remains unknown. Therefore, the current study tests a recent computational model that proposed how midfrontal theta oscillations implement such hierarchical learning via the principle of binding by synchrony (Sync model). More specifically, the Sync model employs bursts at theta frequency to flexibly bind appropriate task modules by synchrony. 64-channel EEG signal was recorded while 27 human subjects (Female: 21, Male: 6) performed a probabilistic reversal learning task. In line with the Sync model, post-feedback theta power showed a linear relationship with negative prediction errors, but not with positive prediction errors. This relationship was especially pronounced for subjects with better behavioral fit (measured via AIC) of the Sync model. Also consistent with Sync model simulations, theta phase-coupling between midfrontal electrodes and temporo-parietal electrodes was stronger after negative feedback. Our data suggest that the brain uses theta power and synchronization for flexibly switching between task rule modules, as is useful for example when multiple stimulus-action mappings must be retained and used.

## Significance Statement

Everyday life requires flexibility in switching between several rules. A key question in understanding this ability is how the brain mechanistically coordinates such switches. The current study tests a recent computational framework (Sync model) that proposed how midfrontal theta oscillations coordinate activity in hierarchically lower task-related areas. In line with predictions of this Sync model, midfrontal theta power was stronger when rule switches were most likely (strong negative prediction error), especially in subjects who obtained a better model fit. Additionally, also theta phase connectivity between midfrontal and task-related areas was increased after negative feedback. Thus, the data

provided support for the hypothesis that the brain uses theta power and synchronization for flexibly switching between rules.

1           Switching between rules is key to function in a complex and rapidly changing environment.  
2   For instance, when at the pub with friends, our behavior is likely guided by different social rules than  
3   at work. However, when the boss suddenly walks into the pub, this requires to flexibly switch between  
4   these two sets of social rules. Importantly, an empirically valid model that explains how the human  
5   brain mechanistically deals with such switches, remains lacking.

6           In experimental settings, this cognitive flexibility in rule switching is typically tested in a  
7   reversal learning setup (Izquierdo, Brigman, Radke, Rudebeck, & Holmes, 2017). Here, agents must  
8   learn task rules, each consisting of a collection of stimulus-action mappings. During the task, these rules  
9   are regularly reversed. One popular framework to explain performance during reversal learning tasks is  
10  the Rescorla-Wagner model (RW; Rescorla & Wagner, 1972; Widrow & Hoff, 1960). Here, on every  
11  trial, obtained reward is used to update the value of active stimulus-action mappings. By learning fast,  
12  the agent can flexibly deal with changes in task rules. However, when feedback is probabilistic (e.g.,  
13  Cools, Clark, Owen, & Robbins, 2002), this approach experiences difficulties. Specifically, a high  
14  learning rate will lead agents to “chase the noise” introduced by probabilistic feedback. In contrast, a  
15  low learning rate increases robustness against noise, but decreases flexibility on rule switches. Thus,  
16  some researchers have proposed that learning rate should be adaptive (e.g., Bai, Katahira, & Ohira,  
17  2014; Behrens, Woolrich, Walton, & Rushworth, 2007; Silvetti, Vassena, Abrahamse, & Verguts,  
18  2018). In this adaptive learning rate (ALR) proposal, agents track rule switches by comparing an  
19  estimate of reward probability to received reward. Consistently high prediction errors indicate that the  
20  underlying rule has changed, and learning rate should be increased. More fundamentally however,  
21  irrespective of learning rate flexibility, both RW and ALR frameworks assume that, on every rule  
22  reversal, old information is overwritten. Especially for more complex problems, this is inefficient, as is  
23  demonstrated by the problem of catastrophic forgetting in artificial neural networks (French, 1999).

24           To overcome catastrophic forgetting, separate task rules may be stored (Saez, Rigotti, Ostojic,  
25  Fusi, & Salzman, 2015; Wilson, Takahashi, Schoenbaum, & Niv, 2014). This poses a new problem of  
26  keeping track which task rule is currently relevant. Recent fMRI research focusing on this hierarchical  
27  approach toward reversal learning has pointed to midfrontal cortex as the responsible neural structure

28 for keeping track of the current task rule (Wilson et al., 2014). However, how midfrontal cortex  
29 mechanistically coordinates neural communication in switching between task rules, remains an open  
30 question.

31 This question was recently addressed by a novel computational framework of hierarchical  
32 learning (Verbeke & Verguts, 2019). This Sync model retains separate mappings for every task rule,  
33 and keeps track of rule reversals by calculating prediction error (e.g., Holroyd & McClure, 2015), thus  
34 avoiding catastrophic forgetting. In order to guide neural communication between areas holding the  
35 appropriate mappings, the model relies on binding by synchrony (BBS; Fries, 2005, 2015; Gray &  
36 Singer, 1989; Womelsdorf et al., 2007) in theta frequency (4-8 Hz). Specifically, midfrontal theta  
37 oscillations synchronize neuronal activity along task-relevant pathways. Thus, task-relevant neurons  
38 can communicate and learn, while stability is achieved in currently irrelevant pathways.

39 The current study empirically tests this Sync model (Fig 1A). For this purpose, the model is  
40 fitted on data of subjects performing a probabilistic reversal learning paradigm, and empirically  
41 compared to alternative models (Bai et al., 2014; Rescorla & Wagner, 1972). Then, Sync model  
42 simulations provided several predictions for EEG measured during the task, specifically in theta  
43 frequency (model-driven EEG predictions). First, a linear relationship between midfrontal theta power  
44 and negative prediction errors was predicted, especially in subjects with good behavioral Sync model  
45 fit. Second, a peak of midfrontal theta power was predicted for data locked to rule switches. Third,  
46 phase-coupling between midfrontal and posterior electrodes was predicted to be stronger after negative  
47 feedback.

## 48 **Materials and Methods**

### 49 **Materials**

50 The experiment was run on a Dell Optiplex 9010 mini-tower running PsychoPy software  
51 (Peirce et al., 2019). Electrophysiological data were recorded using a BioSemi ActiveTwo system  
52 (BioSemi, Amsterdam, Netherlands) with 64 Ag/AgCl electrodes arranged in the standard international  
53 10–20 electrode mapping (Jasper, 1958), with a posterior CMS-DRL electrode pair. Two reference  
54 electrodes were positioned at the left and right mastoids. Eye movements were registered with a pair of

55 electrodes above and below the left eye and two additional electrodes at the outer canthi of both eyes.  
56 EEG signals were recorded at a sampling rate of 1024 Hz.

57 Models were fitted using the differential evolution method of the SciPy (version 1.4.1)  
58 package in Python (version 3.7.6). Other behavioral analyses were done using R software (R Core  
59 Team, 2017). The electrophysiological data were preprocessed in MATLAB R2016b (The MathWorks  
60 Inc., 2016) using an EEGLAB preprocessing pipeline (Delorme & Makeig, 2004). Also for simulations  
61 of the Sync model MATLAB R2016b was used.

## 62 **Code and Data Accessibility**

63 All code used to provide the results described in the current paper is provided at  
64 [https://github.com/CogComNeuroSci/PieterV\\_public/tree/master/Reversal\\_learning](https://github.com/CogComNeuroSci/PieterV_public/tree/master/Reversal_learning). At publication,  
65 also the data will be made freely accessible at <https://osf.io/wt36f/>.

## 66 **Experimental Task**

67 Both the model (27 simulations) and human subjects ( $N = 27$ ) performed a probabilistic  
68 reversal learning task (see Fig 1B). Agents had to learn task rules consisting of two stimulus-action  
69 mappings which were regularly reversed during the task. Every trial started with a centrally presented  
70 white fixation cross for 2000 milliseconds. Then the stimulus was presented for a period of 100  
71 milliseconds. This stimulus was a centrally presented circular grating with a raised-cosine mask and a  
72 size of 7 visual degrees. The grating was either vertically or horizontally oriented. After stimulus  
73 presentation, the screen turned blank until response. Responses were given by pressing the ‘f’- (left) or  
74 ‘j’ (right) key on an azerty keyboard. In task rule 1, the horizontal stimulus mapped to a left response  
75 and the vertical stimulus to the right response; this was reversed for task rule 2. During the task (480  
76 trials), 15 rule switches were introduced. These rule switches occurred at random (uniform distribution  
77 from 15 to 45 trials after the previous task switch). After response, probabilistic feedback was presented  
78 in the center of the screen. This feedback consisted of ‘+10 points’ for rewarded trials, ‘+0 points’ for  
79 unrewarded trials or ‘Respond faster!’ when response times (RT) were slower than 1000 milliseconds.  
80 Subjects had an 80% probability of receiving reward feedback after correct responses and 20% after  
81 incorrect responses. After feedback, the fixation cross appeared again for another 2000 milliseconds.

82 Crucially, the experiment was divided into two experimental blocks (240 trials each). In one block, the  
83 reporting block, the post-feedback fixation cross was presented in green. During this period, subjects  
84 were instructed to press the space bar if they thought the task rule had switched. The purpose of this  
85 approach was to obtain an indication of when the subject reached his or her own ‘Switch threshold’, as  
86 happens in the Sync model. This was only done during one block, so critical changes due to this  
87 difference in task structure could be checked. The order of the two blocks was counterbalanced across  
88 subjects. In between blocks, as well as three times within a block, subjects were allowed a short break.  
89 This break could only occur if there was no rule switch within 10 trials from the break.

### 90 **Human Testing Procedure**

91 34 subjects participated in this study, 7 subjects were removed because of either technical  
92 problems with the EEG recording (4) or an inability to give a correct response on more than 2/3 of the  
93 trials (3), resulting in  $N = 27$  ( $N_{\text{male}} = 6$ ,  $N_{\text{female}} = 21$ ). Subjects were told they would receive €25 for their  
94 participation, with a possibility to earn up to €3 extra reward depending on their performance.

95 Before starting the task, the subject had to go through two short practice sessions with gratings  
96 that were tilted 45° to the left or to the right relative to a vertical line. In the first practice session, the  
97 subject performed 30 trials with only one task rule. Here, the goal was to let the subject get acquainted  
98 with the general paradigm and learn a task rule through probabilistic feedback. Subjects were only  
99 allowed to continue to the second practice session if they performed above chance level (50%) and  
100 could report the correct task rule to the experimenter. If not, they performed this practice session again.  
101 In the second practice session, subjects performed 60 trials of the task with 3 rule switches and with the  
102 post-feedback green fixation cross (as in the reporting block). In this session, subjects pressed the space  
103 bar to indicate a task switch and received feedback for each press. The press was considered correct if  
104 subjects responded within 10 trials from the actual rule switch. They were allowed to continue to the  
105 next task if they were able to perform above chance level and had at least 1 correct indication of a rule  
106 switch. After successfully performing both practice sessions, subjects performed 480 trials of the actual  
107 task.

## 108 **Behavioral Analyses**

109 To check for differences between the reporting block (green fixation cross) and the non-  
110 reporting block (see Experimental Task and Fig 1B), paired t-tests were performed for both accuracy  
111 and RT, depending on experimental block. In order to deal with the skewed distribution of RT, the  
112 natural log of RT was used for all analyses. Additionally, trials with too late responses (RT > 1000  
113 milliseconds; 2.11% of all data) were excluded for both behavioral and EEG analyses.

## 114 **Model Analyses**

115 More extensive analyses of behavioral data were done with a model-based approach. Current  
116 work aims to test the Sync model (Verbeke & Verguts, 2019), but two baseline models were fitted as  
117 well. In the following section, we first provide a detailed overview of the Sync model, followed by a  
118 description of all three models that were fitted on behavioral data. Then, we describe how model fit was  
119 evaluated.

### 120 *The Sync model*

121 An overview of model architecture is provided in Fig 1A. The Sync model consists of two  
122 units, the Mapping and Switch unit. The Mapping unit contains a classic network with 2 layers (visual  
123 input and motor output). Here, weights are adapted with the RW algorithm (Widrow & Hoff, 1960). In  
124 the Sync model, 4 nodes (2 for each response option) at the motor output layer, are divided in 2 rule  
125 modules, one for each task rule. Hence, as in (Wilson et al., 2014), the Mapping unit holds separate  
126 stimulus-action mappings for each task rule. In addition, a Switch unit forms a hierarchically higher  
127 network modeled after primate prefrontal cortex. This Switch unit keeps track of switches in task rule.  
128 Specifically, the Switch unit consists of the lateral frontal cortex (LFC), posterior medial frontal cortex  
129 (pMFC) and anterior midfrontal cortex (aMFC). Here, the LFC holds pointers (e.g., Botvinick et al.,  
130 2001; Cohen, Dunbar, & McClelland, 1990) that indicate which rule should be synchronized in the  
131 Mapping unit. Since BBS implements gating, allowing efficient communication between synchronized  
132 nodes and blocking communication between non-synchronized nodes (Fries, 2005, 2015), the agents'  
133 behavior will be guided by the synchronized rule. This synchronization process is then executed by the  
134 binding by random bursts principle (Springer & Paulsson, 2006; Verguts, 2017; Zhou, Chen, & Aihara,



135 2005). In the Sync model, a theta-frequency-paced signal produced in the pMFC is responsible for  
136 sending these bursts (see Verbeke & Verguts, 2019; Verguts, 2017 for details). The aMFC contains a  
137 neural network (for simplicity not shown in Fig 1A) that is adapted from previous work (Silvetti,  
138 Seurinck, & Verguts, 2011). Here, again RW learning is employed but on a hierarchically higher level.  
139 More specifically, the aMFC learns an expected reward ( $V$ ) for the currently used rule module (see  
140 Equation (6)). This expected reward is compared to an external reward signal ( $Rew$ ; Reward in Fig 1A)  
141 in order to compute prediction errors. The negative prediction error signal is propagated to both the  
142 Accumulator neuron (within the aMFC neural network) and to pMFC. A single negative prediction  
143 error increases (via bursting) the power of the theta signal in pMFC (bursting connection in Fig 1A; see  
144 Verbeke & Verguts, 2019 for details). Instead, the Accumulator neuron evaluates the prediction error  
145 signal on a slower time scale (see also Holroyd & McClure, 2015), and thus requires multiple prediction  
146 errors before activation in the Accumulator neuron reaches its Switch threshold (see Equation (5)).  
147 When this happens, aMFC signals the need for a switch to the LFC. Correspondingly, the LFC will  
148 change the signal to the Mapping unit, and synchronize another rule module. In sum, bursts received  
149 by the Mapping unit are the result of a cooperation between LFC and pMFC. The pMFC determines  
150 the intensity of theta bursts, while the LFC determines which task rule in the Mapping unit is susceptible  
151 to the bursts. For further details see (Verbeke & Verguts, 2019).

152 All nodes in the visual input and motor output layer of the Mapping unit as well as the pMFC  
153 are oscillatory nodes. In line with previous work (Verguts, 2017), oscillatory nodes consist of neuronal  
154 triplets. The neural triplet contains one excitatory-inhibitory pair of phase code neurons ( $E, I$ ) and a rate  
155 code neuron. Here, excitatory neurons are updated by

156

$$\Delta E_i(t) = C I_i(t) - D \times J(r > r_{min}) \times E_i(t) + B_i(t) \quad (1)$$

157

158 where  $\Delta E(t) = E(t + \Delta t) - E(t)$ ; and inhibitory neurons are updated by

159

$$\Delta I_i(t) = -C E_i(t) - D \times J(r > r_{min}) \times I_i(t) \quad (2)$$

160

161 Here, phase code neurons will oscillate at a frequency of  $C/2\pi$ . In the pMFC, which executes top-down  
162 control by sending bursts, activity oscillates at theta (6 Hz) frequency, in line with suggestions of  
163 previous empirical work (Cavanagh & Frank, 2014; Womelsdorf, Johnston, Vinck, & Everling, 2010).  
164 Different from our previous modelling work, theta frequency was used in the Mapping unit (see  
165 Discussion) as well. Because bursts ( $B(t)$ ) lead to a significant increase of power, a radius parameter  
166 ( $r_{min}$ ) is implemented in order to attract power ( $r$ ) back to baseline after a burst. Since continuously high  
167 pMFC power is computationally suboptimal and empirically implausible (Holroyd, 2016), power in the  
168 pMFC was attracted towards a smaller radius,  $r_{min} = .50$ , than in the Mapping unit,  $r_{min} = 1$ . How fast  
169 oscillations decay to baseline is determined by a damping parameter ( $D$ ) which was set to  $D = .30$  in  
170 the Mapping unit. Since the pMFC not only receives bursts but also sends them, a slower decay  $D = .01$   
171 was implemented here to allow a sufficient activity window ( $\sim 500$  ms/3 theta cycles) for bursts to be  
172 sent. In order to reduce model complexity, no oscillations were used in the LFC and aMFC. For a full  
173 description of model dynamics see Verbeke & Verguts, (2019).

174 Thus, in the Sync model, on every trial multiple time steps were simulated in which oscillations  
175 occurred. Here, motor nodes accumulate activation over time. The motor node with the maximal  
176 accumulated activation over time, was considered as the model response. Values of stimulus action  
177 pairs ( $Q$ ) in each rule module ( $R$ ) are updated by

178

$$Q(s, a)_{j+1} = Q(s, a)_j + \alpha * (Rew - Q(s, a)_j) \quad (3)$$

179

180 in which  $\alpha$  is the Mapping learning rate and  $Rew$  is the reward received by the agent.

181 As described above, the Sync model has an additional Switch unit which adds a hierarchical  
182 learning algorithm on top of the RW (fixed learning rate) algorithm in the Mapping unit. This Switch  
183 unit evaluates whether there was a rule switch. More specifically, it learns a value ( $V$ ) for every rule  
184 module ( $R$ ) by

185

$$V(R)_{j+1} = V(R)_j + \alpha_{high} * (Rew - V(R)_j) \quad (4)$$

186

187 in which  $\alpha_{high}$  is the hierarchically higher Switch learning rate. The difference between the expected  
188 value  $V(R)$  in Equation (6) and the obtained  $Rew$  (i.e., the prediction error) is accumulated in the  
189 Accumulator neuron ( $A$ ) via

190

$$A_{j+1} = \gamma * A_j + (1 - \gamma) * f(Rew - V(R)_j) \quad (5)$$

191

192 Since switches are only required when negative feedback occurs, the Accumulator neuron was selective  
193 for negative prediction errors. Specifically,  $f(Rew - V(R)) = -(Rew - V(R))$  when the prediction  
194 error is negative and  $f(Rew - V(R)) = 0$  when the prediction error is positive. Here,  $\gamma$  is the  
195 Cumulation parameter which determines how strongly the Accumulation neuron is affected by a single  
196 prediction error. While a low Cumulation parameter causes the agent to strongly weigh single prediction  
197 error and therefore regularly switch between rule modules, a high Cumulation parameter implements a  
198 more conservative approach. When the Accumulator neuron reaches a Switch threshold of .5, the model  
199 will switch to another rule module ( $R$ ) in the Mapping unit.

## 200 ***Behavioral data fitting***

201 For behavioral data fitting only, the full Sync model was simplified by introducing a hard gating  
202 process between task rules instead of BBS and a softmax response selection mechanism described by

203

$$p(a = i) = \frac{e^{Q(s,i)/\tau}}{\sum_{a=1}^2 e^{Q(s,a)/\tau}} \quad (6)$$

204

205 in which  $Q(s,a)$  is the value of a given stimulus-action pair ( $s, a$ ) and  $\tau$  is the temperature parameter  
206 which determines how strongly the agent explores different actions ( $i$ ). This allowed to skip the loop of  
207 1500 timesteps every trial, which was needed to simulate oscillations (see Equations (1) and (2)). We  
208 refer to this model as the behavioral Sync (bSync) model.

209 On top of the bSync model, two other models were fitted as well. The RW and ALR model  
210 are both restricted to only the Mapping unit (with one rule module). Both models use a response  
211 selection mechanism as described by Equation (6) and learn stimulus-action pairs by Equation (3).  
212 Importantly, the RW model (Rescorla & Wagner, 1972) had a constant learning rate while the ALR  
213 model (Bai et al., 2014), was implemented with an adaptable learning rate. Here, the Mapping learning  
214 rate is updated on every trial by

215

$$\alpha_{j+1} = \eta * |Rew - Q(s, a)_j| + (1 - \eta) * \alpha_j \quad (7)$$

216

217 in which  $\eta$  determines how strongly the learning rate is influenced by the current difference between  
218  $Rew$  and  $Q$  (lower-level prediction error).

### 219 **Model evaluation**

220 For each subject, the goodness of fit of these three models on the behavioral data was  
221 compared by using three measures. The log-likelihood ( $LL$ )

222

$$LL = \sum_{j=1}^J a_j * \ln(p(a_j = 1)) + (1 - a_j) * \ln(p(a_j = 0)) \quad (8)$$

223

224 in which  $p(a)$  is the probability of the given action (see Equation (6)) and  $J$  represents the number of  
225 trials. The Akaike information criterion (AIC) uses this  $LL$  but includes a penalty for the number of  
226 parameters ( $k$ ;  $k = 2$  for RW,  $k = 3$  for ALR and  $k = 4$  for bSync) that were used in the model:

227

$$AIC = 2 * k - 2 * LL \quad (9)$$

228

229 From this AIC, AIC weights ( $wAIC$ ) can be derived which allows to make a relative comparison  
230 between the model fit of the three different models. These  $wAIC$  values are computed as

231

$$wAIC = \frac{e^{-\frac{1}{2}\Delta AIC_m}}{\sum_{m=1}^M e^{-\frac{1}{2}\Delta AIC_m}} \quad (10)$$

232

233 in which  $M$  is the number of models that are compared ( $M = 3$ ) and

234

$$\Delta AIC_m = AIC_m - \min(AIC) \quad (11)$$

235

236 Here,  $\min(AIC)$  is the lowest AIC value out of the three models for that subject. Thus, Equation (10)

237 results in a wAIC value for each model. The sum of all three wAIC values is 1 and models with higher

238 wAIC values provide a better fit to the data.

### 239 *Simulations*

240 In order to provide hypotheses for EEG data, 27 simulations of the full Sync model were

241 performed. For all simulations, the same parameter values were used. These parameter values were

242 sampled from the distribution of best fitting parameter values of the bSync model so that overall

243 accuracy of model simulations ( $M = 78.00\%$ ,  $SD = 1.30$ ) closely resembled accuracy of subjects ( $M =$

244  $76.80\%$ ,  $SD = 4.91$ ). This resulted in a Mapping learning rate ( $\alpha$ ) of .8, a Switch learning rate ( $\alpha_{high}$ ) of

245 .1 and a Cumulation parameter ( $\gamma$ ) of .3. The full Sync model did not use a Temperature ( $\tau$ ) parameter;

246 instead, the synchronization procedure introduces noise, which also introduces some randomness in

247 behavior. The Switch threshold was always fixed to .5. Trials were simulated as a fixed period of 500

248 ms in which the visual layer received stimulation. After this period, the response node with the highest

249 maximum activation was registered as the response of the model. Thereafter, 1500 ms of inter-trial

250 interval was simulated in order to provide a post-feedback period that could be analyzed in the same

251 way as the empirical data. All other aspects of the task, such as the frequency and timing of rule

252 switches, were the same for the model as for the human subjects.

### 253 *Power Analyses*

254 Time-frequency decomposition was performed on the excitatory neuron (see Equation (1))

255 within the neuronal triplet of the model's pMFC node in the model. Complex Morlet wavelets were

256 used for frequencies between 2 and 48 Hz defined in 25 logarithmically spaced steps. For each  
257 frequency, between 3 and 8 cycles were used, also defined in 25 logarithmically spaced steps. Power  
258 was extracted as the squared absolute value of the time-frequency decomposed signal. In order to locate  
259 activity that was specific to feedback processing, the difference between power in trials with negative  
260 feedback and trials with positive feedback was computed. For simplicity, we selected the 2.5% most  
261 positive values as a cluster of interest. This cluster contained one group of data points in theta frequency  
262 and approximately 250-500 ms after feedback (see Verbeke & Verguts, 2019 for timing details). On  
263 every trial, the mean power in this cluster was computed and entered in the consecutive analyses. Since  
264 a negative prediction error in the model increases activity of the pMFC, we performed a linear  
265 regression of cluster power with prediction error as the independent variable. To test our first  
266 hypothesis, that this relationship was specific to negative prediction error, a second regression model  
267 was used that also included the interaction between prediction error and reward. The second hypothesis  
268 states that because negative prediction errors are strongest at the moment of a rule switch, a peak of  
269 post-feedback theta power should be found when data is locked to rule switches. To investigate this, we  
270 extracted power from the model cluster in trials within a 31-trial window around the rule switch (-15 to  
271 +15). The time course (one data point for each of the 31 trials) that resulted after averaging over all (15)  
272 rule switches and all (27) simulations was then used as a regressor in a linear regression with data from  
273 the empirical clusters.

#### 274 *Phase Analyses*

275 Our third hypothesis stated that phase-coupling between pMFC and model nodes in the  
276 Mapping unit was stronger after negative feedback. Specifically, theta power in the model pMFC  
277 increases after negative prediction errors. When there is sufficient power in the pMFC, it will increase  
278 synchronization in the Mapping unit (posterior/lateral task-related regions, e.g., pre-motor or visual  
279 areas). For this purpose, the pMFC uses binding by random bursts (Verguts, 2017). Here, the pMFC  
280 will send bursts to the Mapping unit at specific phases. Thereby it will shift the phase of neurons in the  
281 Mapping unit (see Verbeke & Verguts, 2019 for details). This leads to phase shifts in these lower pre-  
282 motor or visual task-related areas, and a short period of phase-alignment between these task-related

283 areas in the Mapping unit and pMFC. Phase was extracted in all model nodes by taking the angle of the  
284 Hilbert transform of the raw signal. For simplicity the model was implemented without inter-areal  
285 delays. Furthermore, in contrast to analyses on the empirical EEG data (see Equation (12)), control for  
286 volume conduction was not needed, so the regular phase locking value (PLV; Lachaux, Rodriguez,  
287 Martinerie, & Varela, 1999) was computed between the model pMFC and the nodes in the motor layer  
288 of the Mapping unit. This PLV was then averaged over all 4 motor nodes and the time period included  
289 in the power cluster (~250-500 ms post feedback).

## 290 **EEG Analyses**

### 291 *Preprocessing*

292 The data were re-referenced offline to the average of the mastoid electrodes. Breaks or other  
293 offline periods were manually removed. Particularly noisy electrodes were interpolated between  
294 neighboring electrodes on all timesteps. For three subjects, one electrode was interpolated; for another  
295 three subjects we had to interpolate two electrodes; because of a bridge, one subject needed interpolation  
296 for five posterior electrodes. Additionally, activity was band-pass filtered between 1 and 48 Hz in order  
297 to remove slow drifts and line noise of 50 Hz. Eyeblinks and other motor-related noise components  
298 were removed through EEGLAB independent component analysis (ICA). After ICA-removal, the data  
299 was epoched, once locked to feedback onset, and once to stimulus onset. The epochs based on stimulus  
300 onset were used to extract baseline activation, which was -1500 to -500 ms relative to stimulus onset.  
301 This baseline activity was subtracted from all epochs. After epoching, on average 7.5% of epochs were  
302 removed by applying an amplitude threshold of -500 to 500 mV and an improbability test with 6  
303 standard deviations for single electrodes and 2 standard deviations for all electrodes, as described in  
304 Makoto's preprocessing pipeline (Makoto, 2018). Before time-frequency analyses, data was also  
305 downsampled to 512 Hz.

### 306 *Time-frequency Decomposition*

307 Time-frequency decomposition was based on code from (Cohen, 2014). Similar to model  
308 analyses, complex Morlet wavelets were used for frequencies between 2 and 48 Hz defined in 25

309 logarithmically spaced steps. For each frequency, between 3 and 8 cycles were used, also defined in 25  
310 logarithmically spaced steps.

### 311 *Power Computation*

312 A baseline correction was applied by dividing the power estimates for each subject, electrode  
313 and frequency by the average baseline activity (-1500 ms to -500 ms from stimulus onset) across all  
314 480 trials. Finally, the baseline-corrected data underwent a decibel conversion. Before final analyses,  
315 also trials with late responses were removed from the data.

### 316 *Power Cluster Analyses*

317 Similar to model analyses, we were interested in activity selective for feedback. Hence, a  
318 contrast between Z-scored power in trials with negative feedback and trials with positive feedback was  
319 computed. On these values, a non-parametric clustering procedure was applied (Maris & Oostenveld,  
320 2007). The distribution of statistics was computed. On each side of the distribution (two-sided test), the  
321 1% most extreme values were entered into the clustering analysis. From these, we clustered adjacent  
322 neighbors in the channel, frequency and time domains. To calculate our cluster-level statistic, we  
323 multiplied the number of items (i.e., (channel, frequency, time) points) in the cluster with the largest  
324 statistic of that cluster (see also Maris & Oostenveld, 2007). A significance threshold of 5% was  
325 imposed on the subsequent non-parametric permutation test with 1000 iterations. Clusters that survived  
326 this permutation test were taken into the consecutive analyses. As an exploratory analysis, we aimed to  
327 link individual differences in behavioral model fit to EEG data; for that purpose, we extracted the mean  
328 cluster statistic for each subject, and ran a Spearman rank correlation of these statistics with wAIC of  
329 the bSync model obtained in the behavioral model fitting procedure.

### 330 *Midfrontal Theta Power and Prediction Error*

331 The Sync model uniquely yields specific EEG predictions, to which we now turn. To test the  
332 first model-driven EEG hypothesis of a relation between theta power and prediction errors, we first  
333 extracted a measure of prediction error for every subject on every trial by simulating the bSync model.  
334 Importantly, this prediction error was extracted from the learning process on the hierarchically higher  
335 level in the Switch unit (Equation (4)), not the lower-level learning process in the Mapping unit



336 (Equation (3)). This measure of prediction error was then used in a trial-by-trial linear mixed effects  
337 model as a predictor for the Z-scored power of every cluster (averaged across all (time, electrode,  
338 frequency points) in the cluster), that survived the feedback-locked analysis described above. Here, a  
339 random intercept for every subject was included and a fixed slope (i.e., the prediction error). Because  
340 the Sync model predicted different relationships for positive prediction errors and negative prediction  
341 errors, also the interaction between prediction errors and reward was tested. Additionally, in order to  
342 explore whether the individual differences in wAIC influenced the interaction between prediction errors  
343 and reward, also a three-way interaction between prediction error, reward and wAIC was tested. For  
344 these purposes, three regression models were fitted: One in which only prediction error was included  
345 as regressor, one in which both prediction error and the interaction between prediction error and reward  
346 were included as regressors, and finally a third model in which the main effect, the two-way interaction,  
347 and an extra three-way interaction between prediction error, reward and wAIC were included as  
348 regressors. These regression models were then compared via ANOVA.

#### 349 ***Rule Switch Locking***

350 A second model-driven EEG hypothesis considers theta power locked to the moment of a rule  
351 switch. For this analysis, EEG data of 31 trials around the rule switch (-15 to +15 trials, including the  
352 rule switch trial itself) were extracted. On these trials, the mean power within each cluster selective for  
353 feedback was computed. This data was then again averaged over all trials at a specific distance (-15 to  
354 +15) from switch, giving us a time course of mean cluster-power from -15 trials before rule switch to  
355 15 trials after rule switch for every subject. On each time point, a 99.84% confidence interval (CI) was  
356 computed based on a Bonferroni correction for multiple comparisons ( $100-(5/31)$ ). This confidence  
357 interval was compared to a baseline power. Baseline power was computed based on the mean power in  
358 this cluster, averaged over all trials that were more than 15 trials removed from the rule switch.

359 As the rule switch trial, we considered in separate analyses both the actual rule switch and the  
360 subjective indication of a rule switch. Hence, power close to a rule switch was compared with the mean  
361 power of trials that were far from the rule switch. When the confidence interval did not include the  
362 baseline value, power on this trial was considered as significantly deviating from baseline. Additionally,

363 we aimed to investigate the similarity between the data pattern predicted by the model and the empirical  
364 data. For this purpose, data from the bSync model simulations (see above for details) was used as a  
365 linear regressor for the empirical data. Also for this hypothesis, an extra analysis was performed to  
366 investigate whether wAIC had an influence on the observed effect. Here, we extracted subject data on  
367 trials of which cluster power significantly deviated from baseline and used this data as a dependent  
368 variable in a linear regression with wAIC.

### 369 *Midfrontal-Posterior Phase-Coupling Analyses*

370 For the third model-driven EEG hypothesis, we considered all midline electrodes (10) as seed  
371 and other electrodes (54) as receiver in the phase connectivity analyses. Because we were interested in  
372 phase-locking related to rule modules conveying the correct response, all data was lateralized with  
373 respect to the correct response. All data ipsi-lateral to the correct response was brought to the left  
374 electrodes; all contra-lateral data was brought to the right electrodes. The iPLV (Bruña, Maestú, &  
375 Pereda, 2018) was computed between all midline electrodes and all lateral electrodes for every time  
376 point in the feedback-locked data. This iPLV measure was computed by the following equation

377

$$iPLV = \left| \frac{1}{n} \sum_{t=1}^n \text{Im}(e^{-i(\Delta\phi_t)}) \right| \quad (12)$$

378

379 which computes the average phase angle ( $\phi$ ) difference over trials ( $t$ ). By only looking at the imaginary  
380 (Im) part of this phase angle difference, phase differences of zero are eliminated. Hence, volume  
381 conduction effects are excluded, because such volume conduction effects are represented in zero-phase  
382 differences (Bruña et al., 2018; Nolte et al., 2004). Again, a non-parametric cluster algorithm was  
383 performed on the contrast between iPLV for trials with negative versus positive feedback (note that the  
384 fact that our effect of interest compares negative versus positive feedback, also safeguards against  
385 possible volume conduction effects). For this analysis, only data of one midline electrode was used.  
386 More specifically, we checked on which of the 10 midline electrodes the mean contrast in the theta  
387 frequency (4-8 Hz) reached a maximum. This was in the FCz electrode, hence only iPLV between FCz

388 and all lateral electrodes were entered in the clustering algorithm. As for power, an exploratory analysis  
389 was performed in which we extracted the mean cluster statistic for each subject, and ran a Spearman  
390 rank correlation of these statistics with wAIC of the bSync model obtained in the model fitting  
391 procedure.

## 392 **Results**

### 393 **Behavioral Data**

394 Overall, participants had a mean accuracy of 76.80% ( $SD = 4.92\%$ ) and a mean RT of 544ms  
395 ( $SD = 71.31$  ms). A paired t-test confirmed that there were no significant differences between the  
396 experiment block in which subjects had to indicate when a task switch happened or when they did not  
397 have to indicate this (see Materials and Methods for details), neither in accuracy ( $t(26) = .029, p = .977$ ),  
398 nor in RT ( $t(26) = -1.290, p = .208$ ).

### 399 **Model Analyses**

400 The distribution of all fitted parameter values for each model is given in Fig 2A. Goodness of  
401 fit measures are summarized in Table 1. Here, log-likelihood was highest (best) for the bSync model,  
402 lowest for the ALR model, with the RW model in between. When a penalty for model complexity was  
403 applied (AIC, wAIC), the RW and bSync models performed approximately equal. Importantly, wAIC  
404 results indicated significant differences across individuals. As illustrated in Fig 2B, subjects could be  
405 roughly divided into three groups based on the wAIC. In one group (8 subjects), the wAIC were  
406 significantly smaller (worse) for the bSync model ( $M = .12, SD = .026$ ) than for the RW model ( $M =$   
407  $.78, SD = .027$ ). A second group (7 subjects) showed wAIC values that were approximately equally  
408 strong for the bSync ( $M = .44, SD = .036$ ) as for the RW model ( $M = .50, SD = .032$ ). In a third group  
409 (12 subjects), the bSync model showed wAIC that were significantly higher for the bSync model ( $M =$   
410  $.64, SD = .027$ ) than for the RW model ( $M = .32, SD = .026$ ).

411 Three parameters of the bSync model showed a significant correlation with wAIC (Fig 2C).  
412 These parameters were the Switch learning rate ( $\rho = -.761, p < .001$ ), the Cumulation parameter ( $\rho$   
413  $= -.708, p < .001$ ), and the Temperature parameter ( $\rho = -.497, p = .008$ ). There was no significant  
414 correlation with the Mapping learning rate ( $\rho = -.145, p = .468$ ). Additionally, a correlation test

415 between accuracy and wAIC revealed that the bSync model fitted significantly better for subjects with  
416 a lower accuracy ( $\rho = -.510, p = .007$ ). Also correlations between wAIC values and parameters of the  
417 other two models were tested but none of these correlations reached significance.

418 We next estimated a learning curve for each model and each wAIC group (Fig 2D). This  
419 learning curve represents the estimated likelihood of the correct response averaged over all rule switches  
420 and all subjects within a group. Differences in learning curve between the three groups are very subtle:  
421 We conclude that an average measure like switch-locked learning curve does not suffice to empirically  
422 distinguish between the three models.

423 As described in Equation (5), the bSync model only uses negative prediction errors to evaluate  
424 rule switches. Nevertheless, it might be argued that also positive prediction errors determine rule  
425 switching. To test this, an alternative version of the bSync model (bSync-linear) was currently also  
426 fitted. Here,  $f(\text{Rew} - V(R)) = -(\text{Rew} - V(R))$  for all trials. Hence, switch evidence increased for  
427 negative prediction errors and decreased for positive prediction errors. Here, we observed a clear  
428 advantage in terms of AIC for the original bSync model ( $M = 420.70, SD = 2.22$ ) compared to the  
429 alternative bSync-linear model ( $M = 481.12, SD = 75.28$ ). Hence, only the original bSync model was  
430 used for the consecutive analyses.

431 In sum, we found that, for the bSync model, participants' behavior is best explained by the  
432 model version that is biased towards negative prediction errors to evaluate rule switches. When  
433 comparing this bSync model with the RW and ALR models, three groups of participants could be  
434 distinguished. Moreover, the individual measures of model fit correlated significantly with accuracy  
435 and several parameters of the bSync model.

## 436 **EEG and Model Data**

### 437 *Power Cluster Analyses*

438 Cluster analysis on post-feedback power revealed three significant clusters that were selective  
439 for feedback processing (Fig 3). All three clusters appeared between 0 and 750 ms from feedback onset.  
440 As was predicted by the Sync model (Fig 3A), one of these clusters was in the theta frequency range (~  
441 4-8 Hz) and located on midfrontal electrodes (Fig 3B, D). This theta cluster showed more power for

442 negative than for positive feedback. Additionally, we found two clusters located on the posterior  
443 channels. One of these clusters was in the delta frequency ( $< 4$  Hz; Fig 3B, E), the other cluster was  
444 located in the alpha-frequency range ( $\sim 8$ -15 Hz; Fig 3B, C). Both the delta and alpha cluster showed  
445 less power for negative feedback than for positive feedback. No correlation between the power contrast  
446 of a cluster and subjects' wAIC for the bSync reached significance.

#### 447 ***Midfrontal Theta Power and Prediction Error***

448 We next consider the first of three model-driven EEG hypotheses. We first perform statistical  
449 analysis on the Sync-model simulated data (Fig 4A). Theta power in the Sync model data was best  
450 predicted by the regression model that included an interaction between reward and prediction error ( $F(1,$   
451  $11980) = 22133, p < .001$ ). Hence, there was a significant main effect of prediction error ( $F(1, 11980)$   
452  $= 742962, p < .001, \beta = -4.99$ ) and a significant interaction of prediction error and reward ( $F(1, 11980)$   
453  $= 22133, p < .001, \beta = 4.48$ ). Thus, as predicted, the model cluster showed a negative linear relationship  
454 with negative prediction error, and no linear relationship with positive prediction error (Fig 4A).

455 In order to test this prediction in the empirical theta cluster (cluster reported in the previous  
456 section), prediction errors were estimated by simulating the bSync model (see Fig 5A). Importantly,  
457 these prediction error estimates were extracted from learning in the Switch unit (see Equation (4)) and  
458 not from the learning of stimulus-action pairs in the Mapping unit (Equation (3)). For theta power, the  
459 regression model including the interaction between prediction error and reward fitted significantly  
460 better than the regression model with only prediction error as regressor ( $\chi^2(1, N = 27) = 110, p < .001$ ).  
461 Additionally, the regression model including the three-way interaction between prediction error, reward  
462 and wAIC fitted significantly better than the regression model with only the two-way interaction ( $\chi^2(2,$   
463  $N = 27) = 20.74, p < .001$ ). Here, all effects reached significance. Hence, there was a main effect of  
464 prediction error ( $\chi^2(1, N = 27) = 1299, p < .001, \beta = -.79$ ) and an interaction of prediction error with  
465 reward ( $\chi^2(1, N = 27) = 110, p < .001, \beta = .65$ ). Additionally, there was a significant interaction between  
466 prediction error, reward and wAIC ( $\chi^2(2, N = 27) = 20.90, p < .001$ ). As can be observed in Fig 4B  
467 these results indicated a significant negative linear relationship between power and negative prediction

468 error, which was stronger for subjects with a high wAIC (i.e., better behavioral fit of the Sync model);  
469 and an absence of linear relationship between power and positive prediction error which did not differ  
470 significantly for wAIC (Fig 4B). Interestingly, the three-way interaction was significant in the  
471 unrewarded (negative prediction error) trials ( $\beta = -.89, p < .001$ ) but did not reach significance in the  
472 rewarded (positive prediction error) trials ( $\beta = .44, p = .077$ ).

473 For exploratory purposes, we investigated the same regression models in the delta and alpha  
474 clusters. In the delta cluster, the difference in regression model fit between the regression models  
475 without and with the prediction error-reward interaction term did not reach significance ( $\chi^2(1, N = 27)$   
476  $= 3.49, p = .062$ ). However, the regression model that also included the three-way interaction between  
477 prediction error, reward and wAIC fitted significantly better than the regression model with no  
478 interaction terms ( $\chi^2(3, N = 27) = 9.27, p = .026$ ). Here, the main effect of prediction error was  
479 significant ( $\chi^2(1, N = 27) = 5.80, p < .001, \beta = .45$ ). The interaction between prediction error and reward  
480 did not reach significance ( $\chi^2(1, N = 27) = 3.49, p = .062, \beta = -.07$ ). Also the three-way interaction term  
481 did not reach significance ( $\chi^2(2, N = 27) = 5.83, p = .054$ ). However, if the interaction was considered  
482 separately for rewarded trials ( $\beta = .61, p = .018$ ) and unrewarded trials ( $\beta = -.50, p = .033$ ), both reached  
483 significance. As can be observed in Fig 4C, this meant that there was a positive linear relationship  
484 between power and prediction error for both positive and negative prediction error (Fig 4C). For  
485 subjects with low wAIC, the slope in unrewarded trials was similar to the slope in rewarded trials, while  
486 for subjects with high wAIC, an inverse effect of the theta cluster was observed in which there was a  
487 flat slope in unrewarded trials but a steeper slope in rewarded trials.

488 In the alpha cluster, the regression model with the two-way interaction term showed a  
489 significantly better fit than the regression model without interaction ( $\chi^2(1, N = 27) = 224, p < .001$ ).  
490 When the three-way interaction was added, it did not lead to a significantly better regression model ( $\chi^2$   
491  $(2, N = 27) = .35, p = .841$ ). Here, a significant main effect of prediction error ( $\chi^2(1, N = 27) = 142, p$   
492  $< .001, \beta = .85$ ) and a significant interaction between prediction error and reward ( $\chi^2(1, N = 27) = 226,$

493  $p < .001$ ,  $\beta = -1.38$ ) were observed. The three-way interaction between prediction error, reward and  
494 wAIC was not significant ( $\chi^2(2, N = 27) = .360$ ,  $p = .833$ ). As is shown in Fig 4D, power in the alpha  
495 cluster exhibited a positive linear relationship for negative prediction error, but a negative linear  
496 relationship with positive prediction error. These effects did not differ with respect to wAIC.

497 To explore the topology of these interaction effects described above, we conducted another  
498 cluster analysis. Here, we multiplied prediction error (scaled separately for positive and negative  
499 prediction errors) with reward (-1 for unrewarded trials and 1 for rewarded trials) as a regressor for  
500 power. This resulted in a contrast value for the interaction between prediction error and reward for each  
501 electrode, timepoint and frequency. These contrast values were then entered into the clustering  
502 algorithm. As expected, we observed a significant cluster in the alpha frequency (Fig 5B) which was  
503 strongest on posterior electrodes (Fig 5C). We also observed significant effects in the theta and delta  
504 frequency ranges (Fig 5D). Although the interaction pattern for theta (Fig 4B) and delta (Fig 4C) are  
505 mirrored (and thus qualitatively different), they are represented by a similar contrast value, because in  
506 both theta and delta empirical patterns, the slope for positive prediction errors is larger than the slope  
507 for negative prediction errors. Because they are also topographically (partially) overlapping, they were  
508 clustered together by the algorithm, resulting in one cluster that was a mixture of the theta and delta  
509 effects on both time-frequency and topographical level.

510 In sum, in line with model predictions, we found a linear relationship between post-feedback  
511 theta power and negative prediction errors but not with positive prediction errors (interaction between  
512 reward and prediction error). Moreover, we found that this interaction effect was stronger for  
513 participants that fitted better with the bSync model. On top of model predictions, two other clusters  
514 could be distinguished in post-feedback power. Here, a delta cluster showed an almost exactly mirrored  
515 pattern relative to the theta cluster. An alpha cluster showed an inversed U-shaped pattern with respect  
516 to prediction errors.

### 517 ***Rule Switch Locking***

518 For the second model-driven EEG hypothesis, power from the theta, alpha, and delta clusters  
519 was extracted in trials within a 31-trial window from the rule switch (-15 to +15). In all clusters, one



520 trial significantly deviated from baseline power. In the theta cluster (Fig 6A), only the rule switch (0;  
521 i.e., all trials exactly at rule switch) was significant above baseline (CI99.84 [-2.059, .256], *baseline* =  
522 -2.340). Linear regression of the data time course (across 31 trials) on the Sync model time course  
523 showed a significant effect ( $F(1, 835) = 20.51, p < .001, R^2_{\text{adj}} = .023, \beta = .31$ ). In the delta cluster (Fig  
524 6B), only the rule switch (0) was significantly below baseline (CI99.84 [-2.450, -1.265], *baseline* = -  
525 1.201). Linear regression of the data time course on the Sync model time course revealed a significant  
526 correlation ( $F(1, 835) = 7.36, p = .007, R^2_{\text{adj}} = .008, \beta = -.18$ ). For the alpha cluster (Fig 6C), again one  
527 trial was significantly below baseline (CI99.84 [-6.275, -3.603], *baseline* = -3.584). Notably, this was  
528 the point right after the rule switch (+1; i.e., all trials right after the rule switch). Moreover, when data  
529 was locked to the moment where subjects indicated the rule switch (Fig 6D), alpha power reaches a  
530 minimum at this exact moment (CI99.84 [-7.675, -3.686], *baseline* = -3.584). Also in the alpha cluster,  
531 the linear regression of the power on the Sync model pattern reached significance with a negative slope  
532 ( $F(1, 835) = 32.72, p < .001, R^2_{\text{adj}} = .037, \beta = -.65$ ).

533 Power at the peak trials (trials at point 0 for theta and delta, trials at point +1 for alpha) was  
534 extracted and added to a linear regression with wAIC as predictor. This revealed no significant effects  
535 for the theta ( $F(1, 25) = .004, p = .948, R^2_{\text{adj}} = -.040, \beta = -.10$ ) or delta cluster ( $F(1, 25) = .680, p = .417,$   
536  $R^2_{\text{adj}} = -.012, \beta = .66$ ). However, the effect of wAIC did reach significance in the alpha cluster ( $F(1, 25)$   
537  $= 7.22, p = .013, R^2_{\text{adj}} = .193, \beta = 4.17$ ). Fig 7 sheds light on how activity in the alpha cluster differed  
538 depending on wAIC. For illustrative purposes, subjects were divided in three groups of low, middle and  
539 high wAIC. For each group, the data pattern of alpha activity was plotted, once locked to the real rule  
540 switch (Fig 7A) and once locked to the indication of a rule switch (Fig 7B). Here, it is observed that the  
541 alpha pattern is mainly driven by subjects with a low wAIC (i.e., bad fit) for the bSync model.

542 In sum, simulated theta power significantly predicted empirical theta power. Here, theta  
543 power peaked at the moment of a rule switch. Just like in the first model-driven EEG hypothesis, power  
544 from the empirical delta cluster showed the mirrored pattern compared to theta. Remarkably, alpha



545 cluster showed a dip in power, not with respect to the actual rule switch but with respect to the  
546 subjectively indicated rule switch.

### 547 *Midfrontal-Posterior Phase-Coupling Analyses*

548 We next turn to our third model-driven EEG analysis concerning an increase of phase-  
549 coupling between midfrontal and posterior electrodes after negative feedback. As previously described,  
550 in the Sync model, this coupling is induced by bursts that are sent from pMFC to posterior areas in the  
551 Mapping unit. Since pMFC power is stronger after negative feedback, also the number of bursts and  
552 the amount of phase-coupling is increased. To investigate this, we looked at phase-coupling between a  
553 midfrontal electrode (FCz) and all lateral electrodes.

554 Here, non-parametric cluster analyses on the phase-locking data (Fig 8) revealed six  
555 significant clusters that were selective for feedback (for details see Materials and Methods). These  
556 clusters were located in the theta (4; Fig 8A, B, C) or delta (2; Fig 8A, B, D) frequency band. In the  
557 theta frequency band, two clusters were located at temporal electrodes; two other clusters were located  
558 on more lateral/anterior frontal electrodes. In the delta frequency band, both clusters were located on  
559 posterior electrodes. In line with the results of Sync model simulations (Fig 8E), the theta clusters  
560 showed an increase in phase-locking after negative feedback. This was the case for both the ipsilateral  
561 and contralateral electrodes. The delta clusters show the inverse pattern of the theta cluster. Here, phase-  
562 locking was stronger after positive feedback than after negative feedback in both the ipsi- and  
563 contralateral cluster. As in the power analyses, we also explored whether the phase-locking contrast in  
564 each cluster correlated with the subjects' wAIC for the bSync model. None of these correlations reached  
565 significance.

566 In sum, as predicted by the Sync model, we found stronger phase-coupling in the theta  
567 frequency between midfrontal and more posterior electrodes after negative feedback than after positive  
568 feedback. Additionally, we found an increase in phase-coupling between midfrontal and lateral frontal  
569 electrodes, also in the theta frequency range. Similar to our power analyses, we found an inverse effect  
570 in the delta frequency compared to the theta frequency.

571

## Discussion

572

573

574

575

576

577

578

579

580

581

582

583

584

585

586

587

588

589

590

591

592

593

594

595

596

597

The current study aimed to gain insight in the neural mechanisms that allow humans to flexibly adapt to rule changes in the environment. Twenty-seven healthy human subjects were tested on a probabilistic reversal learning task while measuring EEG. Behaviorally, three models of increasing hierarchical complexity were compared. A first, RW model, updated the value of stimulus-action mappings on a trial-by-trial basis with a fixed learning rate. In a second, ALR model, this approach was extended with an adaptable learning rate, allowing the ALR model to flexibly adapt to rule switches (fast learning) but to also be robust to noise evoked by probabilistic feedback (slow learning). The third, Sync model implemented modularity to retain task-specific mappings. It employs hierarchical learning to determine when to switch between rule modules. No evidence was found for the ALR model, while for some subjects the RW model fit best, and for others the Sync model.

Simulations of the Sync model allowed formulation and testing of three model-driven EEG hypotheses. The first hypothesis concerns midfrontal theta and prediction errors. In the Sync model, prediction errors are used to evaluate how much control is needed. The level of control is represented by theta power in the pMFC. Since only negative prediction errors inform about rule switches, the Sync model increased control after negative prediction errors but not after positive prediction errors. Thus, although most previous work (Cavanagh, Cohen, & Allen, 2009; Cavanagh, Frank, Klein, & Allen, 2010; Ergo, De Loof, Janssens, & Verguts, 2019) described a U-shape relationship between prediction error and theta power, we currently hypothesized and observed a selectivity for negative prediction errors (see also Janssen et al., 2016). A linear relationship between prediction error and power in the theta cluster was observed for unrewarded trials (negative prediction error) but not for rewarded trials (positive prediction error). This effect was stronger for subjects with a better Sync model fit. Based on our theoretically driven hypothesis, we did not extract prediction errors from stimulus-action learning but from learning in the Switch unit. Future research should investigate how midfrontal theta is influenced by different types of prediction errors.

Since prediction errors are strongest at the rule switch, a second model-driven hypothesis stated that theta power peaks at rule switches. Again, this hypothesis was empirically supported.

598 Moreover, simulated power significantly predicted power in the empirical theta cluster. Consistent with  
599 earlier work (Cunillera et al., 2012; Sauseng et al., 2006), theta power increased and alpha power  
600 decreased at rule switches. How this theta increase relates to the alpha decrease, and to the individual  
601 differences that we observed, deserves future research.

602 Current work provides a mechanistic explanation how increases in theta power after  
603 prediction errors implement new task rules by synchronizing modules. This resulted in a third model-  
604 driven hypothesis. Here, the Sync model uniquely predicted that phase connectivity would increase  
605 after negative feedback. We found six significant clusters. Four of them were in theta frequency range  
606 and showed the predicted pattern. Two of these clusters were located on posterior-temporal electrodes,  
607 roughly in line with our prediction of motor and visual areas. The remaining four clusters were  
608 consistent with previous work (Cavanagh et al., 2010) showing a feedback-locked, prediction-error  
609 induced increase of theta phase-coupling between midfrontal and lateral frontal sites, and a delta  
610 coupling decrease between midfrontal and posterior cortical sites.

611 Several hypotheses remain to be tested. First, as mentioned in the Methods, previous modeling  
612 work (Verbeke & Verguts, 2019) used gamma frequency in the Mapping unit instead of theta frequency.  
613 This frequency was currently changed because empirical work demonstrated within-frequency (theta-  
614 theta) coupling (Cavanagh et al., 2009; Clouter, Shapiro, & Hanslmayr, 2017) during cognitive tasks,  
615 in addition to cross-frequency coupling. We thus also studied within-frequency coupling empirically.  
616 Nevertheless, future work, using MEG or more invasive measurements, should also study the role of  
617 cross-frequency (theta-gamma) coupling. Second, the limited spatial resolution of EEG did not allow  
618 testing whether task rules are implemented by synchronizing task-relevant modules.

619 Several model extensions can be made. For instance, while for the current reversal learning  
620 task it was sufficient to use prediction error to determine when to make a binary switch, a more  
621 sophisticated approach might apply in everyday life, where contextual cues allow navigating a vast map  
622 of tasks and rules. One way to address this issue is by adding second-level contextual features which  
623 allow the LFC to (learn to) infer which of multiple task modules should be synchronized. Additionally,  
624 scalability of the Sync model is currently limited by how modularity was implemented in the Mapping

625 unit. Here, none of the rule-1 mappings are shared with rule 2. Such a strict division of task mappings  
626 is optimal when mappings are orthogonal. However, when some mappings can be generalized between  
627 tasks, the current approach does not allow knowledge transfer across contexts. As addressed earlier  
628 (Collins & Frank, 2013; Gershman, Blei, & Niv, 2010), a more sustainable way is to construct modules  
629 of mappings that are shared between tasks. Instead of learning each new task from scratch, this approach  
630 allows transferring partial knowledge between tasks. Future work should explore whether these more  
631 complex hierarchical learning algorithms can be integrated in the Sync model.

632         Recent work emphasized that reinforcement learning can operate not only over observed  
633 states, but also over belief states that an agent may infer (Gershman & Uchida, 2019; Wilson et al.,  
634 2014). In the Sync model, there were no (contextual) cues. Therefore, the Sync model could rely  
635 exclusively on prediction errors to estimate the belief state (task rule) of the environment. When  
636 contextual features are added, a future version of the Sync model may estimate belief states in a more  
637 efficient manner. Note also that the Sync model uses two types of prediction error: One to adjust lower-  
638 level mappings, and another to determine the (higher-level) task rule state. Instead, non-hierarchical  
639 models (e.g., RW, ALR) use prediction errors only to adjust lower-level mappings.

640         Building on suggestions of previous work (Piray, Dezfouli, Heskes, Frank, & Daw, 2019), the  
641 current study illustrated how individual differences in model fit can be leveraged to address cognitive  
642 questions. Three groups were distinguished: one group aligned with the RW model, a second group  
643 aligned with the Sync model and in a third group, the RW and Sync model could not be empirically  
644 distinguished. Although the differences between groups were non-significant when averaging over  
645 several trials (e.g., learning curve), more fine-grained measures (e.g., wAIC, trial-by-trial power)  
646 revealed important individual differences. Interestingly, subjects with lower accuracy fitted better with  
647 the Sync model. This is consistent with previous work (Verbeke & Verguts, 2019) which illustrated  
648 that modularity as employed by the Sync model is only beneficial if the learning problem is sufficiently  
649 complex. Furthermore, despite previous work showing a good behavioral fit of the ALR model (Bai et  
650 al., 2014), the fit of the ALR model in the current study was consistently low. In contrast to previous  
651 studies, the current task applied more frequent task rule switches without long stable trial blocks,

652 favoring constant high learning rates. Thus, future work should investigate whether subjects employ  
653 the RW, ALR, or Sync framework depending on the structure and complexity of the task.

654         The Sync model implements modularity via neural oscillations between task-relevant areas.  
655 This concurs with a role of neural oscillations for a wide variety of cognitive functions, including  
656 visual attention (Gray & Singer, 1989; Jensen, Bonnefond, & VanRullen, 2012), working memory  
657 (Hsieh, Ekstrom, & Ranganath, 2011; Lisman & Idiart, 1995), cognitive control (Cavanagh & Frank,  
658 2014) and declarative learning (Ergo, De Loof, & Verguts, 2020). According to the BBS hypothesis  
659 (Fries, 2015), these cognitive functions require binding of several stimuli or features. Current work  
660 described how oscillations, and more specifically synchronization, might be relevant in hierarchical  
661 rule learning.

662         On anatomical-functional level, we built on suggestions from previous work that pMFC  
663 cooperates with LFC to exert hierarchical control over lower-level motor processes (Alexander &  
664 Brown, 2015; Koechlin, Ody, & Kouneiher, 2003). In the Sync model, LFC signals which rule modules  
665 should be synchronized. Consistently, previous theories describe LFC as containing task demands  
666 (Botvinick et al., 2001), and empirical work found strong communication between LFC and pMFC in  
667 cognitive tasks (Cavanagh et al., 2010; Kondo, Osaka, & Osaka, 2004; Mac Donald, Cohen, Stenger,  
668 & Carter, 2000). Also in line with previous data (Boorman, Behrens, Woolrich, & Rushworth, 2009;  
669 Holroyd & McClure, 2015; Wilson et al., 2014), the model aMFC keeps track of the relevant task rule.  
670 Additionally, consistent with fMRI work (Aben, Calderon, Van den Bussche, & Verguts, 2020), current  
671 study found increased coupling between midfrontal cortex and task-related areas when more control  
672 was needed (negative feedback). While this fMRI work showed anatomically detailed networks of  
673 connectivity, current study described how this connectivity may work at algorithmic level.

674         To summarize, we have demonstrated how the brain might employ synchronization to bind  
675 task-relevant areas for efficient rule switching. To achieve this, we used EEG, computational modelling,  
676 individual differences, and behavioral analysis. We believe that this approach might reveal how more  
677 complicated tasks can be implemented via synchronization as well.

678

## References

- 679 Aben, B., Calderon, C. B., Van den Bussche, E., & Verguts, T. (2020). Cognitive effort modulates  
680 connectivity between dorsal anterior cingulate cortex and task-relevant cortical areas. *The*  
681 *Journal of Neuroscience*, *40*(19), JN-RM-2948-19. [https://doi.org/10.1523/jneurosci.2948-](https://doi.org/10.1523/jneurosci.2948-19.2020)  
682 [19.2020](https://doi.org/10.1523/jneurosci.2948-19.2020)
- 683 Alexander, W. H., & Brown, J. W. (2015). Hierarchical error representation: A computational model  
684 of anterior cingulate and dorsolateral prefrontal cortex. *Neural Computation*, *27*(11), 2354–  
685 2410. <https://doi.org/10.1162/NECO>
- 686 Bai, Y., Katahira, K., & Ohira, H. (2014). Dual learning processes underlying human decision-making  
687 in reversal learning tasks: Functional significance and evidence from the model fit to human  
688 behavior. *Frontiers in Psychology*, *5*(AUG), 1–8. <https://doi.org/10.3389/fpsyg.2014.00871>
- 689 Behrens, T. E. J., Woolrich, M. W., Walton, M. E., & Rushworth, M. F. S. (2007). Learning the value  
690 of information in an uncertain world. *Nature Neuroscience*, *10*(9), 1214–1221.  
691 <https://doi.org/10.1038/nn1954>
- 692 Boorman, E. D., Behrens, T. E. J., Woolrich, M. W., & Rushworth, M. F. S. (2009). How green is the  
693 grass on the other side? Frontopolar cortex and the evidence in favor of alternative courses of  
694 action. *Neuron*, *62*(5), 733–743. <https://doi.org/10.1016/j.neuron.2009.05.014>
- 695 Botvinick, M. M., Braver, T. S., Barch, D. M., Carter, C. S., & Cohen, J. D. (2001). Conflict  
696 monitoring and cognitive control. *Psychological Review*, *108*(3), 624–652.  
697 <https://doi.org/10.1037/0033-295X.108.3.624>
- 698 Bruña, R., Maestú, F., & Pereda, E. (2018). Phase locking value revisited: Teaching new tricks to an  
699 old dog. *Journal of Neural Engineering*, *15*(5). <https://doi.org/10.1088/1741-2552/aacfe4>
- 700 Cavanagh, J. F., Cohen, M. X., & Allen, J. J. B. B. (2009). Prelude to and resolution of an error : EEG  
701 phase synchrony reveals cognitive control dynamics during action monitoring. *Journal of*  
702 *Neuroscience*, *29*(1), 98–105. <https://doi.org/10.1523/JNEUROSCI.4137-08.2009>
- 703 Cavanagh, J. F., & Frank, M. J. (2014). Frontal theta as a mechanism for cognitive control. *Trends in*  
704 *Cognitive Sciences*, *18*(8), 414–421. <https://doi.org/10.1016/j.tics.2014.04.012>

- 705 Cavanagh, J. F., Frank, M. J., Klein, T. J., & Allen, J. J. B. B. (2010). Frontal theta links prediction  
706 errors to behavioral adaptation in reinforcement learning. *NeuroImage*, *49*(4), 3198–3209.  
707 <https://doi.org/10.1016/j.neuroimage.2009.11.080>
- 708 Clouter, A., Shapiro, K. L., & Hanslmayr, S. (2017). Theta phase synchronization is the glue that  
709 binds human associative memory. *Current Biology*, *27*(20), 1–6.  
710 <https://doi.org/10.1016/j.cub.2017.09.001>
- 711 Cohen, J. D., Dunbar, K., & McClelland, J. L. (1990). On the control of automatic processes: a  
712 parallel distributed processing account of the Stroop effect. *Psychological Review*, *97*(3), 332–  
713 361. <https://doi.org/10.1037/0033-295X.97.3.332>
- 714 Cohen, M. X. (2014). *Analyzing neural time series data: Theory and practice*. Cambridge,  
715 Massachusetts: The MIT Press.
- 716 Collins, A. G. E., & Frank, M. J. (2013). Cognitive control over learning: Creating, clustering, and  
717 generalizing task-set structure. *Psychological Review*, *120*(1), 190–229.  
718 <https://doi.org/10.1037/a0030852>
- 719 Cools, R., Clark, L., Owen, A. M., & Robbins, T. W. (2002). Defining the neural mechanisms of  
720 probabilistic reversal learning using event-related functional magnetic resonance imaging. *The*  
721 *Journal of Neuroscience : The Official Journal of the Society for Neuroscience*, *22*(11), 4563–  
722 4567. <https://doi.org/20026435>
- 723 Cunillera, T., Fuentemilla, L., Periañez, J., Marco-Pallarès, J., Krämer, U. M., Càmara, E., ... Antoni,  
724 R. F. (2012). Brain oscillatory activity associated with task switching and feedback processing.  
725 *Cognitive, Affective and Behavioral Neuroscience*, *12*(1), 16–33.  
726 <https://doi.org/10.3758/s13415-011-0075-5>
- 727 Delorme, A., & Makeig, S. (2004). EEGLAB: An open source toolbox for analysis of single-trial  
728 EEG dynamics including independent component analysis. *Journal of Neuroscience Methods*,  
729 *134*(1), 9–21. <https://doi.org/10.1016/j.jneumeth.2003.10.009>
- 730 Ergo, K., De Loof, E., Janssens, C., & Verguts, T. (2019). Oscillatory signatures of reward prediction  
731 errors in declarative learning. *NeuroImage*, *186*(September 2018), 137–145.



- 732 <https://doi.org/10.1016/j.neuroimage.2018.10.083>
- 733 Ergo, K., De Loof, E., & Verguts, T. (2020). Reward prediction error and declarative memory. *Trends*  
734 *in Cognitive Sciences*, 24(5), 388–397. <https://doi.org/10.1016/j.tics.2020.02.009>
- 735 French, R. M. (1999). Catastrophic forgetting in connectionist networks. *Trends in Cognitive*  
736 *Sciences*, 6613(April), 128–135.
- 737 Fries, P. (2005). A mechanism for cognitive dynamics: neuronal communication through neuronal  
738 coherence. *Trends in Cognitive Sciences*, 9(10), 474–480.  
739 <https://doi.org/10.1016/j.tics.2005.08.011>
- 740 Fries, P. (2015). Rhythms for cognition: Communication through coherence. *Neuron*, 88(1), 220–235.  
741 <https://doi.org/10.1016/j.neuron.2015.09.034>
- 742 Gershman, S. J., Blei, D. M., & Niv, Y. (2010). Context, learning, and extinction. *Psychological*  
743 *Review*, 117(1), 197–209. <https://doi.org/10.1037/a0017808>
- 744 Gershman, S. J., & Uchida, N. (2019). Believing in dopamine. *Nature Reviews Neuroscience*, 20(11),  
745 703–714. <https://doi.org/10.1038/s41583-019-0220-7>
- 746 Gray, C. M., & Singer, W. (1989). Stimulus-specific neuronal oscillations in orientation columns of  
747 cat visual cortex. *Proceedings of the National Academy of Sciences of the United States of*  
748 *America*, 86(5), 1698–1702. <https://doi.org/10.1073/pnas.86.5.1698>
- 749 Holroyd, C. B. (2016). The waste disposal problem of effortful control. In T. S. Braver (Ed.),  
750 *Motivation and cognitive control* (pp. 235–260). Hove, UK: Psychology Press.
- 751 Holroyd, C. B., & McClure, S. M. (2015). Hierarchical control over effortful behavior by rodent  
752 medial frontal cortex: A computational model. *Psychological Review*, 122(1), 54–83.  
753 <https://doi.org/10.1037/a0038339>
- 754 Hsieh, L. T., Ekstrom, A. D., & Ranganath, C. (2011). Neural oscillations associated with item and  
755 temporal order maintenance in working memory. *Journal of Neuroscience*, 31(30), 10803–  
756 10810. <https://doi.org/10.1523/JNEUROSCI.0828-11.2011>
- 757 Izquierdo, A., Brigman, J. L., Radke, A. K., Rudebeck, P. H., & Holmes, A. (2017). The neural basis  
758 of reversal learning: An updated perspective. *Neuroscience*, 345, 12–26.



- 759 <https://doi.org/10.1016/j.neuroscience.2016.03.021>
- 760 Janssen, D. J. C., Poljac, E., & Bekkering, H. (2016). Binary sensitivity of theta activity for gain and  
761 loss when monitoring parametric prediction errors. *Social Cognitive and Affective Neuroscience*,  
762 *11*(8), 1280–1289. <https://doi.org/10.1093/scan/nsw033>
- 763 Jasper, H. (1958). The ten twenty electrode system of the international federation.  
764 *Electroencephalogr. Clin. Neurophysiol.*, (10), 371–375.
- 765 Jensen, O., Bonnefond, M., & VanRullen, R. (2012). An oscillatory mechanism for prioritizing salient  
766 unattended stimuli. *Trends in Cognitive Sciences*, *16*(4), 200–205.  
767 <https://doi.org/10.1016/j.tics.2012.03.002>
- 768 Koechlin, E., Ody, C., & Kouneiher, F. (2003). The architecture of cognitive control in the human  
769 prefrontal cortex. *Science (New York, NY)*, *302*(5648), 1181–1185.  
770 <https://doi.org/10.1126/science.1088545>
- 771 Kondo, H., Osaka, N., & Osaka, M. (2004). Cooperation of the anterior cingulate cortex and  
772 dorsolateral prefrontal cortex for attention shifting. *NeuroImage*, *23*(2), 670–679.  
773 <https://doi.org/10.1016/j.neuroimage.2004.06.014>
- 774 Lachaux, J. P., Rodriguez, E., Martinerie, J., & Varela, F. J. (1999). Measuring phase synchrony in  
775 brain signals. *Human Brain Mapping*, *8*(4), 194–208. [https://doi.org/10.1002/\(SICI\)1097-  
776 0193\(1999\)8:4<194::AID-HBM4>3.0.CO;2-C](https://doi.org/10.1002/(SICI)1097-0193(1999)8:4<194::AID-HBM4>3.0.CO;2-C)
- 777 Lisman, J. E., & Idiart, M. A. P. (1995). Storage of  $7 \pm 2$  short-term memories in oscillatory  
778 subcycles. *Science*, *267*(5203), 1512–1515. <https://doi.org/10.1126/science.7878473>
- 779 Mac Donald, A. W., Cohen, J. D., Stenger, A. V., & Carter, C. S. (2000). Dissociating the role of the  
780 dorsolateral prefrontal and anterior cingulate cortex in cognitive control. *Science*, *288*(June),  
781 1835–1838. <https://doi.org/10.1126/science.288.5472.1835>
- 782 Makoto, M. (2018). Makoto's preprocessing pipeline. Retrieved from  
783 [https://sccn.ucsd.edu/wiki/Makoto%27s\\_preprocessing\\_pipeline](https://sccn.ucsd.edu/wiki/Makoto%27s_preprocessing_pipeline)
- 784 Maris, E., & Oostenveld, R. (2007). Nonparametric statistical testing of EEG- and MEG-data. *Journal  
785 of Neuroscience Methods*, *164*(1), 177–190. <https://doi.org/10.1016/j.jneumeth.2007.03.024>

- 786 Nolte, G., Bai, O., Wheaton, L., Mari, Z., Vorbach, S., & Hallett, M. (2004). Identifying true brain  
787 interaction from EEG data using the imaginary part of coherency. *Clinical Neurophysiology*,  
788 *115*(10), 2292–2307. <https://doi.org/10.1016/j.clinph.2004.04.029>
- 789 Peirce, J., Gray, J. R., Simpson, S., MacAskill, M., Höchenberger, R., Sogo, H., ... Lindeløv, J. K.  
790 (2019). PsychoPy2: Experiments in behavior made easy. *Behavior Research Methods*, *51*(1),  
791 195–203. <https://doi.org/10.3758/s13428-018-01193-y>
- 792 Piray, P., Dezfouli, A., Heskes, T., Frank, M., & Daw, N. (2019). Hierarchical Bayesian inference for  
793 concurrent model fitting and comparison for group studies. *PLoS Computational Biology*, *15*(6),  
794 34. <https://doi.org/https://doi.org/10.1371/journal.pcbi.1007043>
- 795 R Core Team. (2017). R: A language and environment for statistical computing. Vienna, Austria.
- 796 Rescorla, R. A., & Wagner, A. R. (1972). A theory of Pavlovian conditioning: Variations in the  
797 effectiveness of reinforcement and nonreinforcement. *Classical Conditioning II Current*  
798 *Research and Theory*, *21*(6), 64–99. <https://doi.org/10.1101/gr.110528.110>
- 799 Saez, A., Rigotti, M., Ostojic, S., Fusi, S., & Salzman, C. D. (2015). Abstract context representations  
800 in primate amygdala and prefrontal Cortex. *Neuron*, *87*(4), 869–881.  
801 <https://doi.org/10.1016/j.neuron.2015.07.024>
- 802 Sauseng, P., Klimesch, W., Freunberger, R., Pecherstorfer, T., Hanslmayr, S., & Doppelmayr, M.  
803 (2006). Relevance of EEG alpha and theta oscillations during task switching. *Experimental*  
804 *Brain Research*, *170*(3), 295–301. <https://doi.org/10.1007/s00221-005-0211-y>
- 805 Silvetti, M., Seurinck, R., & Verguts, T. (2011). Value and prediction error in medial frontal cortex:  
806 Integrating the single-unit and systems levels of analysis. *Frontiers in Human Neuroscience*,  
807 *5*(August), 75. <https://doi.org/10.3389/fnhum.2011.00075>
- 808 Silvetti, M., Vassena, E., Abrahamse, E., & Verguts, T. (2018). Dorsal anterior cingulate-brainstem  
809 ensemble as a reinforcement meta-learner. *PLoS Computational Biology*, *14*(8), 1–32.  
810 <https://doi.org/10.1371/journal.pcbi.1006370>
- 811 Springer, M., & Paulsson, J. (2006). Harmonies from noise. *Nature*, *439*(January), 27–29.  
812 <https://doi.org/doi:10.1038/439027a>

- 813 The MathWorks Inc. (2016). MATLAB R2016B. Natick, Massachusetts, United States.
- 814 Verbeke, P., & Verguts, T. (2019). Learning to synchronize: How biological agents can couple neural  
815 task modules for dealing with the stability-plasticity dilemma. *PLoS Computational Biology*,  
816 *15*(8). <https://doi.org/10.1371/journal.pcbi.1006604>
- 817 Verguts, T. (2017). Binding by random bursts: A computational model of cognitive control. *Journal*  
818 *of Cognitive Neuroscience*, *29*(6), 1103–1118. <https://doi.org/10.1162/jocn>
- 819 Widrow, B., & Hoff, M. M. E. (1960). Adaptive switching circuits. *IRE WESCON Convention*  
820 *Record*, *4*(1), 96–104.
- 821 Wilson, R. C., Takahashi, Y. K., Schoenbaum, G., & Niv, Y. (2014). Orbitofrontal cortex as a  
822 cognitive map of task space. *Neuron*, *81*(2), 267–279.  
823 <https://doi.org/10.1016/j.neuron.2013.11.005>
- 824 Womelsdorf, T., Johnston, K., Vinck, M., & Everling, S. (2010). Theta-activity in anterior cingulate  
825 cortex predicts task rules and their adjustments following errors. *Proceedings of the National*  
826 *Academy of Sciences*, *107*(11), 5248–5253. <https://doi.org/10.1073/pnas.0906194107>
- 827 Womelsdorf, T., Schoffelen, J., Oostenveld, R., Singer, W., Desimone, R., Engel, A. K., & Fries, P.  
828 (2007). Modulation of neuronal interactions through neuronal synchronization. *Science*,  
829 *316*(1609), 1609–1612. <https://doi.org/10.1126/science.1139178>
- 830 Zhou, T., Chen, L., & Aihara, K. (2005). Molecular communication through stochastic  
831 synchronization induced by extracellular fluctuations. *Physical Review Letters*,  
832 *178*103(October), 2–5. <https://doi.org/10.1103/PhysRevLett.95.178103>

833

834 **Figure and table legends**



842 trials). In this reporting block, subjects had to press the space bar during this period if they thought the rule had  
 843 switched.

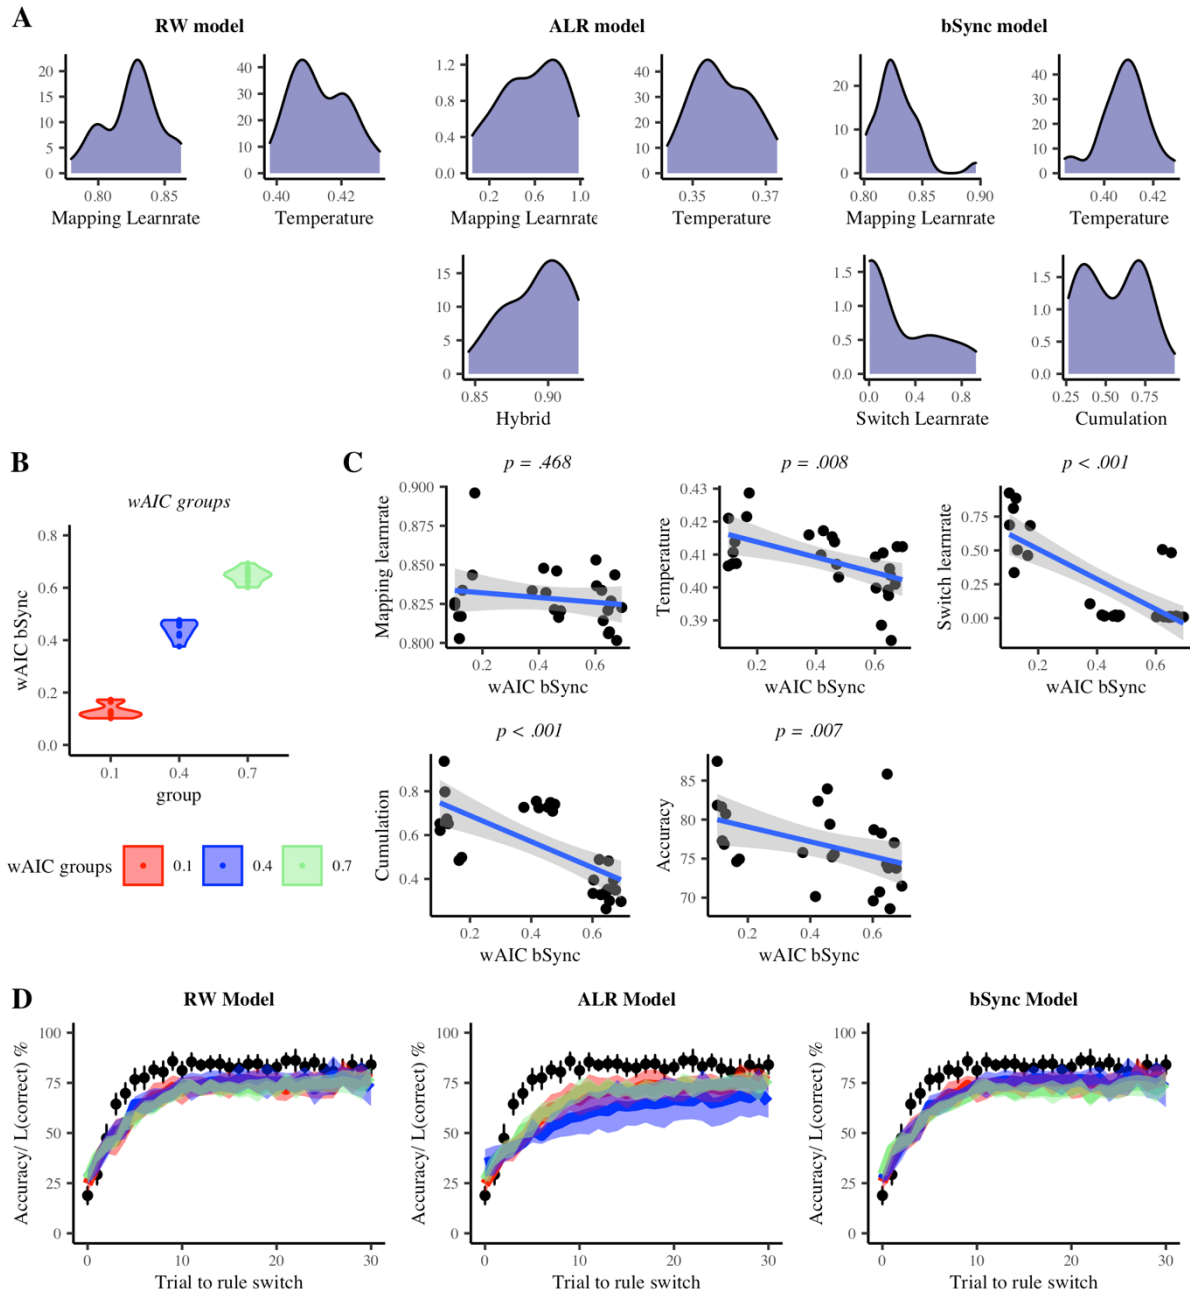

844

845 **Fig 2. Model comparison.** *A: Parameter distributions.* Distributions of fitted parameter values are shown for  
 846 each model. *B: wAIC groups.* This figure illustrates how wAIC values can be roughly divided in three groups  
 847 (colors). *C: Correlation plots.* Correlations are shown between wAIC of the bSync model and all parameters of  
 848 the bSync model. In the lower middle plot, also the correlation between wAIC and task accuracy is shown. *D:*  
 849 *Learning curve fit.* Black dots represent the mean accuracy data over all subjects. The error bars show the 95%

850 confidence intervals. The colored lines illustrate the mean Likelihood of the correct response for each wAIC group  
 851 in B. The shades represent the 95% confidence interval.

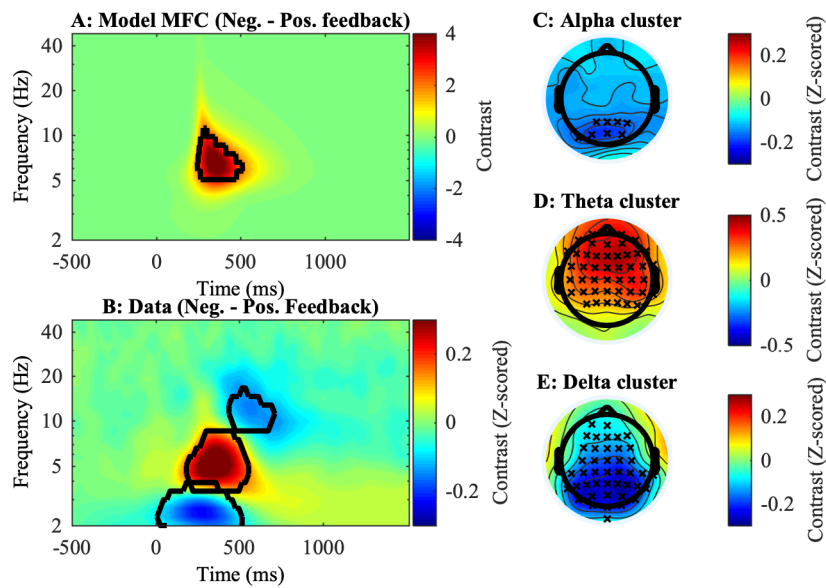

852  
 853 **Fig 3. Power results.** A-B: Time-Frequency plots of contrast (Negative – Positive feedback). Significant clusters  
 854 are indicated by the black contour line. A: Contrast of power in the model pMFC. B: Contrast for Z-scored power  
 855 in the human data, averaged over all 64 electrodes. C-E: topographical plots of clusters found in the human data.  
 856 Crosses indicate channels where the contrast reached significance.

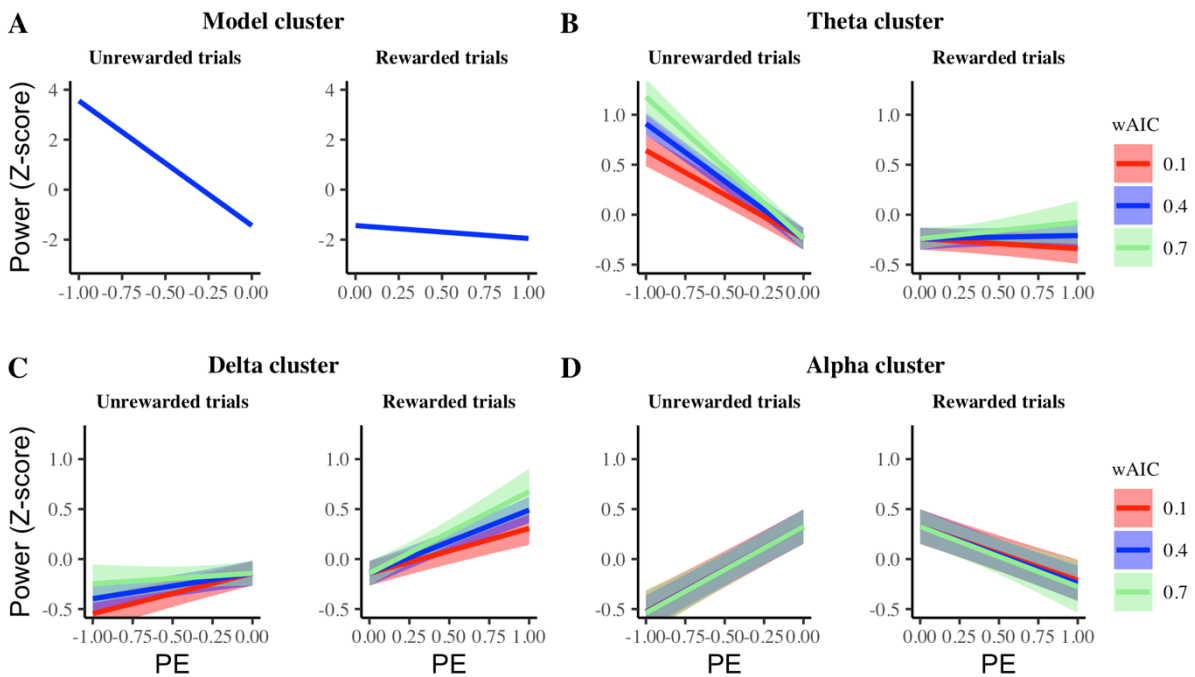

857  
 858 **Fig 4. Result of linear regression between power and prediction error (PE) in all clusters.** Lines illustrate the  
 859 trial-by-trial relation between the estimated prediction errors and the mean power extracted from the clusters in

860 Fig 3. The shades represent 95% confidence intervals. The Model cluster (A) aimed to predict empirical data from  
861 the theta cluster (B). For exploratory purposes, also the relation between estimated prediction errors and power in  
862 the delta (C) and alpha (D) cluster are shown.

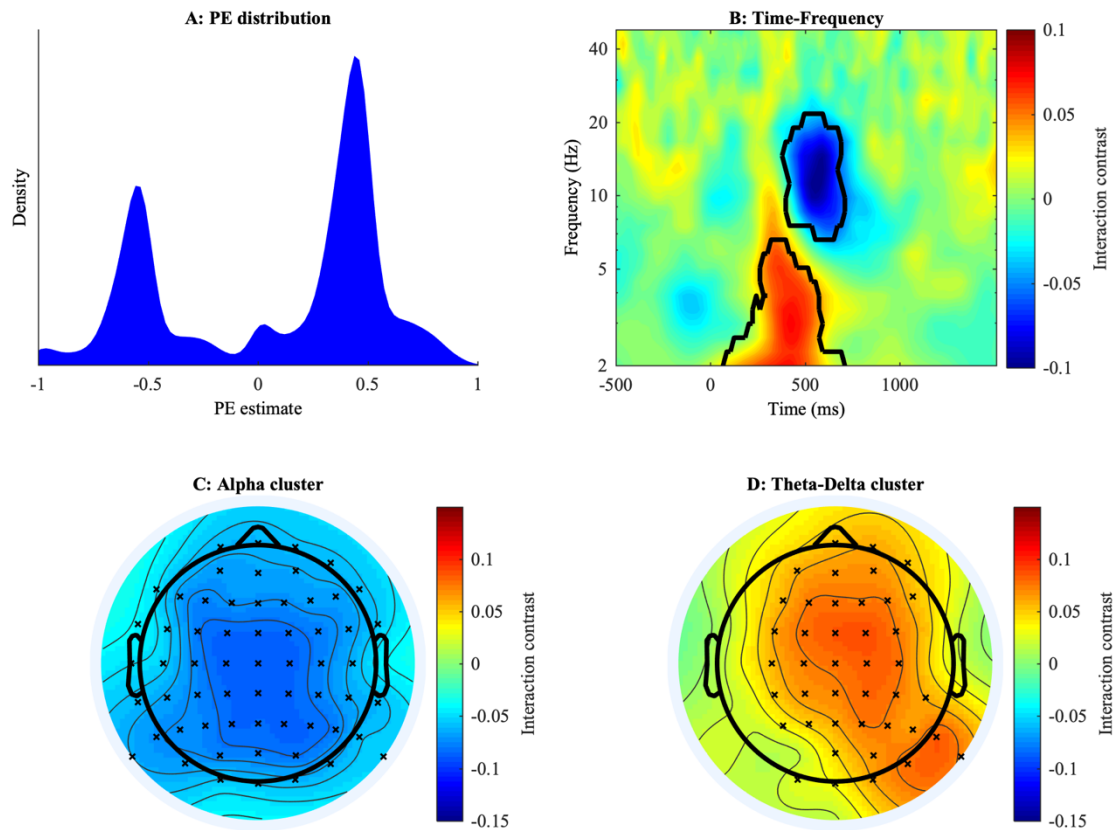

863  
864 **Fig 5. Interaction between prediction error and reward in power.** *A: Distribution of prediction error*  
865 *estimates.* Note that these prediction error estimates are not used for learning stimulus-action pairs, but for module  
866 learning in the Switch unit (Equation (4)). *B: Time-frequency results.* Colors represent the contrast value of the  
867 interaction effect. Black contours indicate significant clusters. *C: Topography of the alpha interaction cluster.* *D:*  
868 *Topography of the theta-delta interaction cluster.* Crosses indicate channels where the contrast reached  
869 significance.



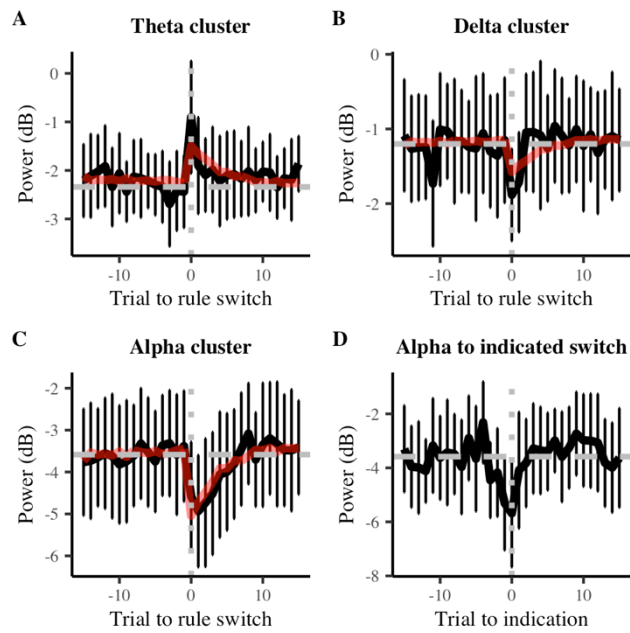

870

871 **Fig 6. Power locked to rule switch.** Black lines show the mean power. Error bars show the 99.84% confidence  
872 interval (Bonferroni correction). The horizontal grey dashed line represents baseline power and the vertical grey  
873 dotted line indicates the moment of the rule switch. The red line visualizes the result of linear regression between  
874 the Sync model and human data. *A-C* show data locked to the moment of the actual rule switch. *D* shows data of  
875 the alpha cluster locked to the moment when subjects indicated they noticed the task switch.

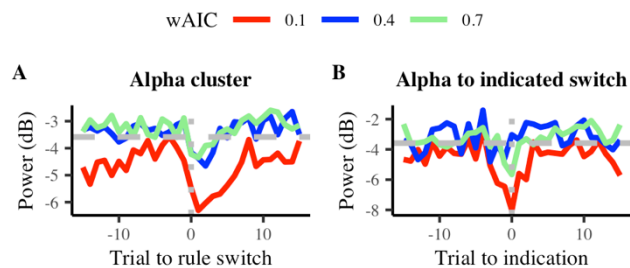

876

877 **Fig 7. Power locked to rule switch for different wAIC.** Data patterns are shown for different wAIC values  
878 (colored lines). The horizontal grey dashed line shows the baseline power over all subjects and the vertical grey  
879 dotted line indicates the moment of the rule switch (A) or indication of rule switch (B).



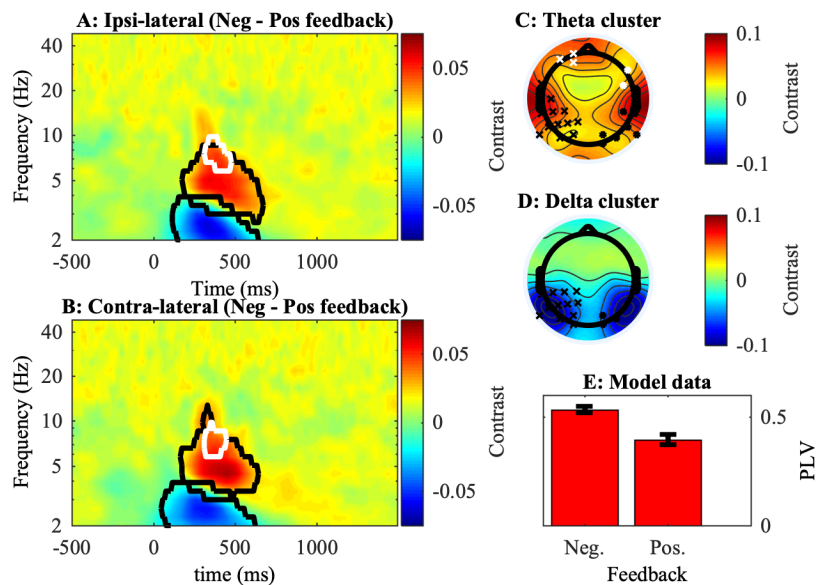

880

881 **Fig 8. Phase-locking with respect to FCz.** A-B: Time-Frequency plots of contrast (Negative – Positive feedback).

882 Significant clusters are indicated by the black or white contour line. The black line represents posterior clusters

883 in C and D (black crosses) while the white line represents the frontal clusters in C (white crosses). All plots show

884 phase-locking with respect to the FCz electrode. A: Contrast of iPLV averaged over all ipsi-lateral electrodes. B:

885 Contrast of iPLV averaged over all contra-lateral electrodes. C-D: Topographical plots of clusters. Data was

886 averaged over all time points and frequencies that were included in the respective contours of A and B. Channels

887 where the contrast reached significance are marked by crosses or dots. The left channels (crosses) present ipsi-

888 lateral electrodes and the right channels (dots) present contra-lateral electrodes. Again, the white color was used

889 to distinguish the frontal clusters from the temporal clusters. E: Predicted phase-coupling in the model for the

890 250-500 ms post-feedback period.

891

| Model | Mean LL | SD LL | Mean AIC | SD AIC | Mean wAIC | SD wAIC |
|-------|---------|-------|----------|--------|-----------|---------|
| RW    | -208.08 | .07   | 420.16   | .13    | .51       | .20     |
| ALR   | -209.31 | .05   | 424.63   | .10    | .05       | .02     |
| bSync | -206.35 | 1.11  | 420.70   | 2.22   | .44       | .22     |

892

893 **Table 1. Goodness of fit measures.** Results of log-likelihood (LL), AIC and wAIC computations over subjects

894 are shown for each of three models. For LL and wAIC, high values indicate a better fit, while for AIC a low value

895 indicates a good fit.

896
